# Supplementary material for: Fabrication of TiO2/NiO p-n Nanocomposite for Enhancement Dye Photodegradation under Solar Radiation
Source: MDPI journal article supplement (doi:10.3390/nano12060989), 2022-03-17
Supplement: s1 [file s1]

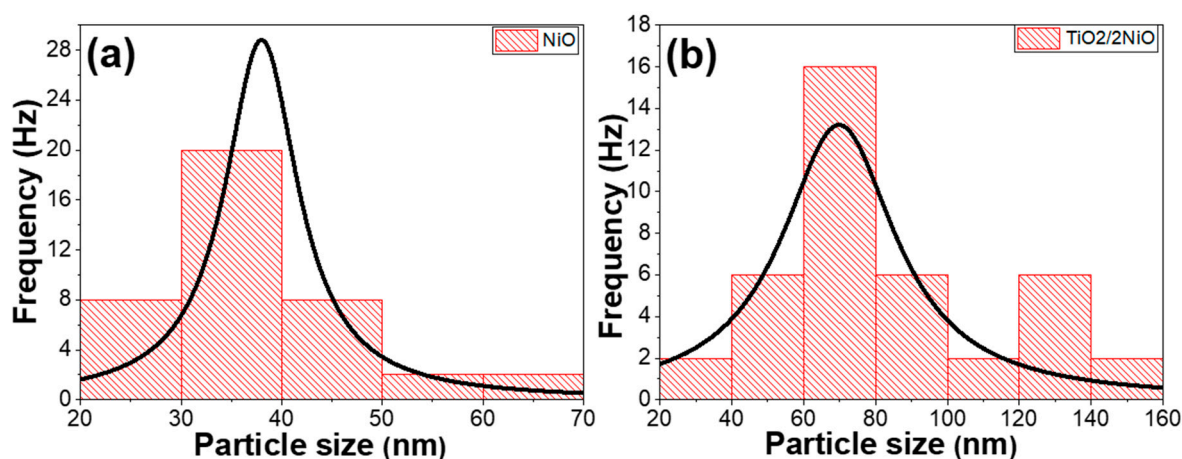

**Figure S1.** Histograms of the particle size distribution for (a) NiO and (b) TiO<sub>2</sub>/2NiO.

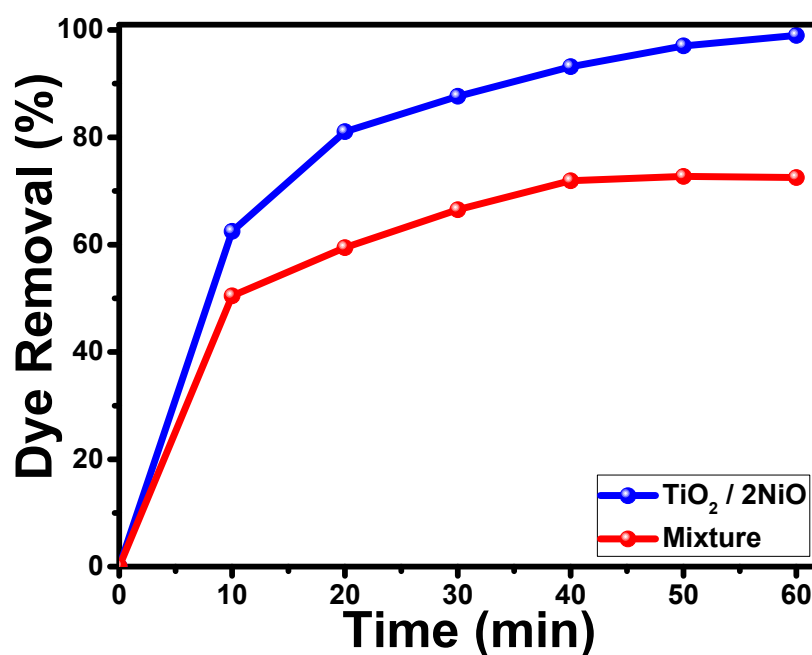

**Figure S2.** The photocatalytic performance of TiO<sub>2</sub>/2NiO composite versus the performance of TiO<sub>2</sub>/2NiO mixture.

As shown in Figure S1, we combined TiO<sub>2</sub> and NiO particles with ratio 1:2 and investigated the photocatalytic activity of the TiO<sub>2</sub>/2NiO mixture versus the TiO<sub>2</sub>/2NiO composite. The results demonstrate that the TiO<sub>2</sub>/2NiO composite (approximately 99.8% after 60 min) has superior photocatalytic performance in comparison to the TiO<sub>2</sub>/2NiO mixture (about 58.9% after 60 min). This is due to the TiO<sub>2</sub>/2NiO composite generating p-n junctions.
